# Supplementary material
Source: ML conference proceedings conference paper supplement (https://openaccess.thecvf.com/content/ICCV2021/html/Kim_Multi-Modality_Associative_Bridging_ICCV_2021_paper.html)
Supplement: Supplementary file 2 [file Kim_Multi-Modality_Associative_Bridging_ICCV_2021_supplemental.zip]

Archive with 4 entries (4 files):
- 11373-supp/11373-supp.pdf
- 11373-supp/demo_address.mp4
- 11373-supp/demo_dependent.mp4
- 11373-supp/demo_independent.mp4
